# Supplementary material
Source: MDPI journal article supplement (https://www.mdpi.com/2673-4141/2/1/6)
Supplement: s1 [file s1]

# Supplementary Materials: Energetics of LOHC: Structure-Property Relationships from Network of Thermochemical Experiments and in Silico Methods

Sergey P. Verevkin, Vladimir N. Emel'yanenko, Riko Siewert and Aleksey A. Pimerzin

**Table S1.** Provenance, purity, methods of purification and analysis of chemicals used in this work.

| Compound                  | CAS       | Source | Initial purity | Final purity <sup>a</sup> |
|---------------------------|-----------|--------|----------------|---------------------------|
| 2-methyl-quinoxaline      | 7251-61-8 | TCI    | 98%            | 0.999                     |
| 2,3-di-methyl-quinoxaline | 2379-55-7 | Alfa   | 97%            | 0.998                     |

<sup>a</sup> Purification was performed by the fractional distillation in vacuum for the liquids and fractional sublimation for solids. Mass fraction impurity was determined by the gas chromatography.

## Transpiration Method: Vapor Pressure Measurements

Vapor pressures of pyrazine derivatives were measured using the transpiration method [1–3]. About 0.5 g of the sample was mixed with small glass beads and placed in the thermostatted U-shaped saturator. A nitrogen stream with well-defined flow rate was passed through the saturator at a constant temperature ( $\pm 0.1$  K), and the transported material was collected in a cold trap. The amount of condensed sample was determined by GC analysis using the *n*-alkanes as an external standard. The absolute vapor pressure  $p_i$  at each temperature  $T_i$  was calculated from the amount of the product, collected within a definite period.

In our apparatus, the contribution due to diffusion was negligible at a flow rate up to  $0.45 \text{ dm}^3 \cdot \text{h}^{-1}$ . The upper limit for our apparatus where the speed of nitrogen could already disturb the equilibration was at a flow rate of  $9.0 \text{ dm}^3 \cdot \text{h}^{-1}$ . Thus, we carried out the experiments in the flow rate interval of  $(2 \text{ to } 4) \text{ dm}^3 \cdot \text{h}^{-1}$ , which has ensured that the transporting gas was in saturated equilibrium with the coexisting liquid phase in the saturation tube. The saturation vapor pressure  $p_{sat}$  at each temperature  $T_i$  was calculated from the amount of the material collected in the cold trap within a definite period of time. The amount of the transported material was determined by the GC analysis using an external standard (hydrocarbon  $n\text{-C}_n\text{H}_{2n+2}$ ). Assuming validity of the Dalton's law applied to the nitrogen stream saturated with the substance *i*, values of  $p_i$  were calculated with equation:

$$p_i = m_i \cdot R \cdot T_a / V \cdot M_i \quad (\text{S1})$$

$$V = V_{\text{N}_2} + V_i = (n_{\text{N}_2} + n_i) \cdot R \cdot T_a / P_a, \quad (\text{S2})$$

where  $V$  is the volume of the gas phase consisting of the  $n_{\text{N}_2}$  moles of the carrier gas and  $n_i$  mole of gaseous compound under study at the atmospheric pressure  $P_a$  and the ambient temperature  $T_a$ . The volume of the carrier gas  $V_{\text{N}_2}$  was determined by the digital flow rate sensor from integration with a microcontroller. We used the Honeywell S&C-HAF-BLF0200C2AX5 digital flow rate sensor with uncertainty at the level of 2.5%. The flow rate of the nitrogen stream was also controlled by using a soap bubble flow meter and optimized in order to reach the saturation equilibrium of the transporting gas at each temperature under study. The volume of the carrier gas  $V_{\text{N}_2}$  was read from the calibrated digital flow rate sensor.

**Table S2.** Results of transpiration method for quinoxaline derivatives: absolute vapor pressures  $p$ , standard molar vaporization/sublimation enthalpies and standard molar vaporization/sublimation entropies.

| $T/$<br>K <sup>a</sup>                                                                                                 | $m/$<br>mg <sup>b</sup> | $V(N_2)^c /$<br>dm <sup>3</sup> | $T_s/$<br>K <sup>d</sup> | $Flow/$<br>dm <sup>3</sup> ·h <sup>-1</sup> | $p/$<br>Pa <sup>e</sup> | $u(p)/$<br>Pa <sup>f</sup> | $\Delta_{l,cr}^g H_m^o(T)$<br>kJ mol <sup>-1</sup> | $\Delta_{l,cr}^g S_m^o(T)$<br>J·K <sup>-1</sup> ·mol <sup>-1</sup> |
|------------------------------------------------------------------------------------------------------------------------|-------------------------|---------------------------------|--------------------------|---------------------------------------------|-------------------------|----------------------------|----------------------------------------------------|--------------------------------------------------------------------|
| 2-methyl-quinoxaline: $\Delta_{l,cr}^g H_m^o(298.15 \text{ K}) = (64.04 \pm 0.8) \text{ kJ} \cdot \text{mol}^{-1}$     |                         |                                 |                          |                                             |                         |                            |                                                    |                                                                    |
| $\ln(p/p^o) = \frac{300.6}{R} - \frac{85630.2}{RT} - \frac{70.7}{R} \ln \frac{T}{298.15}$                              |                         |                                 |                          |                                             |                         |                            |                                                    |                                                                    |
| 288.7                                                                                                                  | 0.71                    | 5.692                           | 295.9                    | 3.08                                        | 2.14                    | 0.06                       | 65.22                                              | 136.5                                                              |
| 293.5                                                                                                                  | 0.68                    | 3.539                           | 295.9                    | 3.08                                        | 3.31                    | 0.09                       | 64.88                                              | 135.3                                                              |
| 298.4                                                                                                                  | 0.59                    | 2.000                           | 295.9                    | 3.08                                        | 5.08                    | 0.15                       | 64.53                                              | 134.0                                                              |
| 303.4                                                                                                                  | 0.49                    | 1.077                           | 295.9                    | 3.08                                        | 7.75                    | 0.22                       | 64.18                                              | 132.9                                                              |
| 308.3                                                                                                                  | 0.63                    | 0.897                           | 295.9                    | 3.08                                        | 12.04                   | 0.33                       | 63.84                                              | 132.1                                                              |
| 313.2                                                                                                                  | 1.08                    | 1.035                           | 295.9                    | 4.14                                        | 17.86                   | 0.47                       | 63.49                                              | 130.9                                                              |
| 318.1                                                                                                                  | 0.75                    | 0.513                           | 295.9                    | 3.08                                        | 25.07                   | 0.65                       | 63.14                                              | 129.5                                                              |
| 323.1                                                                                                                  | 1.65                    | 0.769                           | 295.9                    | 3.08                                        | 36.57                   | 0.94                       | 62.79                                              | 128.5                                                              |
| 328.0                                                                                                                  | 1.54                    | 0.513                           | 295.9                    | 3.08                                        | 51.30                   | 1.31                       | 62.44                                              | 127.4                                                              |
| 332.0                                                                                                                  | 2.04                    | 0.513                           | 295.9                    | 3.08                                        | 67.86                   | 1.72                       | 62.16                                              | 126.6                                                              |
| 2,3-di-methyl-quinoxaline: $\Delta_{l,cr}^g H_m^o(298.15 \text{ K}) = (84.6 \pm 0.8) \text{ kJ} \cdot \text{mol}^{-1}$ |                         |                                 |                          |                                             |                         |                            |                                                    |                                                                    |
| $\ln(p/p^o) = \frac{306.5}{R} - \frac{94030.2}{RT} - \frac{31.5}{R} \ln \frac{T}{298.15}$                              |                         |                                 |                          |                                             |                         |                            |                                                    |                                                                    |
| 313.2                                                                                                                  | 5.35                    | 45.900                          | 293.2                    | 4.34                                        | 1.79                    | 0.05                       | 84.16                                              | 177.9                                                              |
| 318.3                                                                                                                  | 5.68                    | 29.275                          | 293.2                    | 4.34                                        | 2.99                    | 0.08                       | 84.00                                              | 177.3                                                              |
| 323.3                                                                                                                  | 3.55                    | 11.710                          | 293.2                    | 4.34                                        | 4.67                    | 0.12                       | 83.85                                              | 176.5                                                              |
| 328.3                                                                                                                  | 5.36                    | 10.987                          | 293.2                    | 4.34                                        | 7.52                    | 0.21                       | 83.69                                              | 176.0                                                              |
| 333.2                                                                                                                  | 8.32                    | 10.409                          | 293.2                    | 4.34                                        | 12.3                    | 0.3                        | 83.53                                              | 175.9                                                              |
| 338.1                                                                                                                  | 14.68                   | 11.638                          | 293.2                    | 4.34                                        | 19.4                    | 0.5                        | 83.38                                              | 175.5                                                              |
| 343.2                                                                                                                  | 9.15                    | 4.988                           | 293.2                    | 4.34                                        | 28.3                    | 0.7                        | 83.22                                              | 174.5                                                              |
| 348.0                                                                                                                  | 6.59                    | 2.385                           | 293.2                    | 4.34                                        | 42.6                    | 1.1                        | 83.07                                              | 174.1                                                              |
| 348.1                                                                                                                  | 5.49                    | 1.954                           | 293.2                    | 2.06                                        | 43.2                    | 1.1                        | 83.07                                              | 174.2                                                              |
| 353.0                                                                                                                  | 7.59                    | 1.807                           | 293.2                    | 4.34                                        | 64.7                    | 1.6                        | 82.91                                              | 173.8                                                              |
| 353.0                                                                                                                  | 8.40                    | 1.952                           | 293.2                    | 4.34                                        | 66.3                    | 1.7                        | 82.91                                              | 174.0                                                              |
| 358.0                                                                                                                  | 7.55                    | 1.157                           | 293.2                    | 4.34                                        | 100.5                   | 2.5                        | 82.75                                              | 173.8                                                              |
| 358.1                                                                                                                  | 5.37                    | 0.836                           | 293.2                    | 2.95                                        | 98.8                    | 2.5                        | 82.75                                              | 173.6                                                              |
| 363.0                                                                                                                  | 5.53                    | 0.607                           | 293.2                    | 2.14                                        | 140.2                   | 3.5                        | 82.59                                              | 172.9                                                              |
| 368.0                                                                                                                  | 6.90                    | 0.514                           | 293.2                    | 2.06                                        | 206.3                   | 5.2                        | 82.44                                              | 172.6                                                              |
| 372.5                                                                                                                  | 9.62                    | 0.514                           | 293.2                    | 2.06                                        | 287.3                   | 7.2                        | 82.30                                              | 172.3                                                              |

<sup>a</sup> Saturation temperature ( $u(T) = 0.1 \text{ K}$ ). <sup>b</sup> Mass of transferred sample condensed at  $T = 243 \text{ K}$ . <sup>c</sup> Volume of nitrogen ( $u(V) = 0.005 \text{ dm}^3$ ) used to transfer  $m$  ( $u(m) = 0.0001 \text{ g}$ ) of the sample. <sup>d</sup>  $T_s$  is the temperature of the soap bubble meter used for measurement of the gas flow. <sup>e</sup> Vapour pressure at temperature  $T$ , calculated from the  $m$  and the residual vapour pressure at the condensation temperature calculated by an iteration procedure. <sup>f</sup> Uncertainties were calculated with  $u(p_i/\text{Pa}) = 0.005 + 0.025(p_i/\text{Pa})$  for pressures below 5 Pa and with  $u(p_i/\text{Pa}) = 0.025 + 0.025(p_i/\text{Pa})$  for pressures from 5 to 3000 Pa. The uncertainties for  $T$ ,  $V$ ,  $p$ ,  $m$ , are standard uncertainties with 0.683 confidence level. Uncertainties of the vaporization/sublimation enthalpies are expressed as the expanded uncertainty (0.95 level of confidence,  $k = 2$ ). They were calculated according to a procedure described elsewhere [2,3]. Uncertainties include uncertainties from the experimental conditions and the fitting equation, vapor pressures, and uncertainties from adjustment of vaporization/sublimation enthalpies to the reference temperature  $T = 298.15 \text{ K}$ .

### Vapor pressure data treatment

The temperature dependences of vapor pressure  $p$  measured in this work were fitted with the following equation [1]:

$$R \ln p_i = a + \frac{b}{T} + \Delta_{l,cr}^g C_{p,m}^o \ln \left( \frac{T}{T_0} \right), \quad (\text{S3})$$

where  $a$  and  $b$  are adjustable parameters and  $\Delta_{l,cr}^g C_{p,m}^o$  is the difference of the molar heat capacities of the gas and the liquid (or crystalline) phases respectively.  $T_0$  appearing in

Equation (S3) is an arbitrarily chosen reference temperature (which has been chosen to be  $T_0 = 298.15$  K) and  $R$  is the molar gas constant. Values of  $\Delta_{l,cr}^g C_{p,m}^o$  used for the data treatment of vapor pressures in Equation (S3), given in Table S3 were estimated according to empirical procedure [4] based on the heat capacity values  $C_{p,m}^o$  (liq or cr) calculated by using the group additivity method [5].

Vapor temperature dependences have been used to derive the standard molar enthalpy of vaporization/sublimation of pyrazine derivatives at different temperatures,  $T$ , using the following equation:

$$\Delta_{l,cr}^g H_m^o(T) = -b + \Delta_{l,cr}^g C_{p,m}^o T \quad (S4)$$

Entropies of vaporization at temperatures  $T$  were also derived from the temperature dependence of vapor pressures using Equation (S5):

$$\Delta_{l,cr}^g S_m^o(T) = \Delta_{l,cr}^g H_m^o/T + R \ln(p/p^o) \quad (S6)$$

Experimental absolute vapor pressures, coefficients  $a$  and  $b$  of Equation (S3), as well as values of  $\Delta_{l,cr}^g H_m^o(T)$  and  $\Delta_{l,cr}^g S_m^o(T)$  are given in Table S2 (primary data) and the results together with  $\Delta_{l,cr}^g H_m^o$  for pyrazine derivatives available in the literature are collected in Table 1 (main text). Procedure for calculation of the combined uncertainties of the vaporization/sublimation enthalpies includes uncertainties from the transpiration experimental conditions, uncertainties in vapor pressure, and uncertainties in the temperature adjustment to  $T = 298.15$  K as described elsewhere [2,3].

**Table S3.** Compilation of data on molar heat capacities  $C_{p,m}^o$  and differences  $\Delta_{l,cr}^g C_{p,m}^o$  of pyrazine derivatives, in  $J \cdot K^{-1} \cdot mol^{-1}$ , 298.15 K.

| compound                  | $C_{p,m}^o$ (liq) <sup>a</sup> | $-\Delta_{l,cr}^g C_{p,m}^o$ <sup>b</sup> | $C_{p,m}^o$ (cr) <sup>a</sup> | $-\Delta_{cr}^g C_{p,m}^o$ <sup>b</sup> |
|---------------------------|--------------------------------|-------------------------------------------|-------------------------------|-----------------------------------------|
| 2-methyl-quinoxaline      | 231.2                          | 70.7                                      | -                             | -                                       |
| 2,3-di-methyl-quinoxaline | 259.6                          | 78.1                                      | 205.0                         | 31.5                                    |

<sup>a</sup> Calculated according to the procedure developed by Chickos *et al.* [5] <sup>b</sup> Calculated according to the procedure developed by Chickos and Acree [4].

**Table S4.** Compilation of enthalpies of vaporization/sublimation  $\Delta_{l,cr}^g H_m^o$  for pyrazine derivatives derived from the data available in the literature.

| Compound                   | Technique <sup>a</sup> | T-range     | $\Delta_{l,cr}^g H_m^o$ | $\Delta_{l,cr}^g H_m^o$     | Ref.    |  |
|----------------------------|------------------------|-------------|-------------------------|-----------------------------|---------|--|
|                            |                        |             | ( $T_{av}$ )            | (298.15 K) <sup>b</sup>     |         |  |
|                            |                        | K           | $kJ \cdot mol^{-1}$     | $kJ \cdot mol^{-1}$         |         |  |
| pyrazine(cr)               | T                      | -           | -                       | <b>57.5±0.4</b>             | [6]     |  |
| pyrazine(liq)              | T                      | -           | -                       | <b>42.0±0.6</b>             | [6]     |  |
| methylpyrazine (liq)       | S                      | 400-500     | 36.0                    | 44.7±2.0                    | [7]     |  |
|                            | F                      | 287.6-391.6 | 42.4±0.8                | 44.3±1.0                    | [8]     |  |
|                            | CGC                    | 298         | -                       | 43.7±3.8                    | [9]     |  |
|                            | S                      | 263.7-362.9 | 43.3±0.4                | 43.8±0.4                    | [10]    |  |
|                            | S                      | 291.4-345.2 | 43.5±0.4                | 44.5±0.6                    | [11]    |  |
|                            |                        |             |                         | <b>44.0±0.3<sup>c</sup></b> | average |  |
| ethyl-pyrazine (liq)       | DC                     | 363         | 57.9±1.9                | 48.8±1.9                    | [12]    |  |
|                            | T                      | 283.5-313.1 | 48.3±1.0                | 48.3±1.0                    | [11]    |  |
|                            |                        |             |                         | <b>48.4±0.9<sup>c</sup></b> | average |  |
| n-propyl-pyrazine (liq)    | T                      | 282.7-313.2 | 51.9±0.8                | <b>51.9±1.0</b>             | [11]    |  |
| tert-butyl-pyrazine (liq)  | T                      | 282.7-313.2 | 50.5±0.2                | <b>50.5±0.4</b>             | [11]    |  |
| 2,3-dimethylpyrazine(liq)  | T                      | 280.6-308.2 | 48.1±0.8                | <b>47.8±1.0</b>             | [11]    |  |
| 2,5-dimethylpyrazine (liq) | F                      | 302.5-411.3 | 44.5±0.8                | 47.6±1.0                    | [8]     |  |
|                            | DC                     | 329         | 52.8±1.1                | 48.9±1.1                    | [13]    |  |
|                            | CGC                    | 298         | -                       | 47.2±4.4                    | [9]     |  |
|                            | T                      | 291.6-335.2 | 47.3±0.6                | 48.2±0.8                    | [11]    |  |

|                            |     |             |           |                              |         |
|----------------------------|-----|-------------|-----------|------------------------------|---------|
|                            |     |             |           | <b>48.2±0.5</b> <sup>c</sup> | average |
| 2,6-dimethylpyrazine (cr)  | T   | 278.7-307.5 | 63.7±1.0  | <b>63.5±1.4</b>              | [11]    |
| 2,6-dimethylpyrazine (liq) |     |             |           | 45.3±1.4                     | [11]    |
| 2,3-diethyl-pyrazine (liq) | DC  | 384         | 69.8±1.7  | 52.6±1.7                     | [12]    |
|                            | CGC | 298         |           | 54.8±1.5                     | [11]    |
|                            |     |             |           | <b>53.8±1.1</b> <sup>c</sup> | average |
| trimethylpyrazine (liq)    | DC  | 376         | 66.5±1.6  | 53.9±1.6                     | [14]    |
|                            | T   | 278.5-323.4 | 51.5±0.8  | 51.6±1.0                     | [11]    |
|                            |     |             |           | <b>52.2±0.8</b> <sup>c</sup> | average |
| tetramethylpyrazine (cr)   | DC  | 377         | 109.3±4.0 | (94.6±4.0)                   | [14]    |
|                            | T   | 293.7-343.1 | 75.9±0.6  | <b>76.5±1.0</b>              | [11]    |
| tetramethylpyrazine (liq)  |     |             |           | <b>57.6±1.3</b>              | [11]    |

<sup>a</sup> Techniques: T = transpiration; S = static; E = ebulliometry; DC = drop calorimetry; F = flow method; CGC = correlation gas chromatography; K = Knudsen effusion method. In this table, uncertainties of the vaporization/sublimation enthalpies are expressed as the expanded uncertainty (0.95 level of confidence,  $k = 2$ ). They were calculated according to a procedure described elsewhere [1,2]. Uncertainties include uncertainties from the experimental conditions and the fitting equation, vapor pressures, and uncertainties from adjustment of vaporization/sublimation enthalpies to the reference temperature  $T = 298.15$  K. Value in brackets was not involved in calculation of the average value.<sup>b</sup> Vapor pressures available in the literature were treated using Equations (S3) and (S4) with help of heat capacity differences from Table S3 to evaluate the enthalpy of vaporization at 298.15 K in the same way as our own results in Table S2.<sup>c</sup> Weighted mean value (the uncertainty was taken as the weighing factor). Values highlighted in bold were recommended for thermochemical calculations.

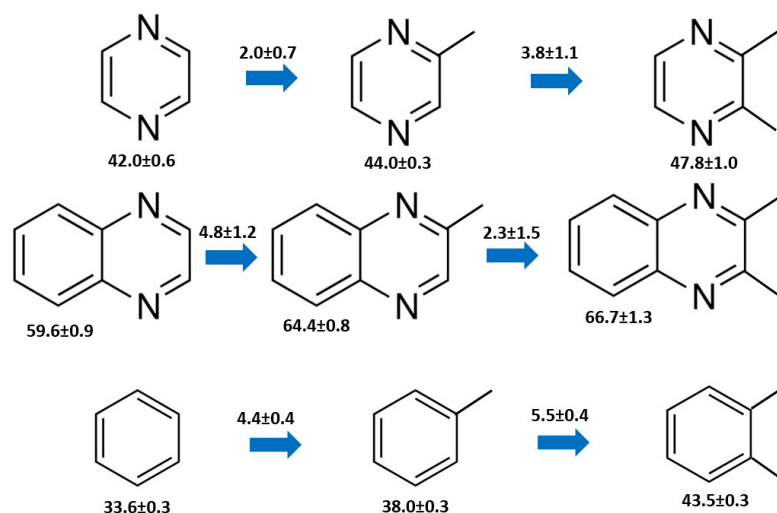

**Figure S1.** Comparison of vaporization enthalpies  $\Delta_v^g H_m^o(298 \text{ K})$  of pyrazines (data are from Table S4), quinolones (data are from Table 1), and benzenes (data are from [20]). All data are in  $\text{kJ}\cdot\text{mol}^{-1}$ .

**DSC: Enthalpy of fusion measurements.** The thermal behavior of 2,3-dimethylquinoline including melting temperature and enthalpies of fusion was studied with a Mettler Toledo 822. Details are given elsewhere [15]. The instrument was standardized using indium metal with a mass fraction of 0.9999. The samples were hermetically sealed in 50  $\mu\text{L}$  pans supplied by Perkin Elmer. The thermal behavior of the specimen was investigated during heating the sample with a rate of  $10 \text{ K}\cdot\text{min}^{-1}$ . The DSC measurements were repeated in triplicate and values agreed within the experimental uncertainties  $u(\Delta_{\text{cr}}^{\text{L}} H_m^{\text{O}}) = 0.3 \text{ kJ}\cdot\text{mol}^{-1}$  for the enthalpy of fusion and  $u(T) = 0.3 \text{ K}$  for the melting temperature. Uncertainties in the temperature adjustment of fusion enthalpies from  $T_{\text{fus}}$  to the reference temperature are estimates and amount to 30 % of the total adjustment [16].

The fusion enthalpies of pyrazine derivatives at  $T_{\text{fus}}$  K were measured by the (see Table 2). For the thermochemical calculations the experimental enthalpy of fusion has to be adjusted to the reference temperature  $T = 298.15$  K. The adjustments were calculated with help of Equation (S6) [4]:

$$\Delta_{\text{cr}}^{\text{l}}H_{\text{m}}^{\circ}(298.15 \text{ K})/(\text{J}\cdot\text{mol}^{-1}) = \Delta_{\text{cr}}^{\text{l}}H_{\text{m}}^{\circ}(T_{\text{fus}}/\text{K}) - (\Delta_{\text{cr}}^{\text{g}}C_{\text{p,m}}^{\circ} - \Delta_{\text{l}}^{\text{g}}C_{\text{p,m}}^{\circ}) \times [(T_{\text{fus}}/\text{K}) - 298.15 \text{ K}] \quad (\text{S6})$$

where  $\Delta_{\text{cr}}^{\text{g}}C_{\text{p,m}}^{\circ}$  and  $\Delta_{\text{l}}^{\text{g}}C_{\text{p,m}}^{\circ}$  were taken from Table S3. With this adjustment, the molar enthalpies of fusion,  $\Delta_{\text{cr}}^{\text{l}}H_{\text{m}}^{\circ}(298.15 \text{ K})$  of pyrazine derivatives were calculated. The latter values were used for calculations of vaporization enthalpies according to the general equation:

$$\Delta_{\text{l}}^{\text{g}}H_{\text{m}}^{\circ}(298.15 \text{ K}) = \Delta_{\text{cr}}^{\text{g}}H_{\text{m}}^{\circ}(298.15 \text{ K}) - \Delta_{\text{cr}}^{\text{l}}H_{\text{m}}^{\circ}(298.15 \text{ K}) \quad (\text{S7})$$

As well as for calculation of the liquid-phase enthalpies of formation according to the general Equation 8 (see main text). Results are given in Table S5.

### Correlation of $\Delta_{\text{l}}^{\text{g}}H_{\text{m}}^{\circ}(298.15 \text{ K})$ of pyrazine derivatives with Kovat's indices

The correlation of the enthalpies of vaporization with the Kovat's indices of the organic compounds is a valuable method to study the systematic behaviour in a homologous series. The vaporization enthalpy  $\Delta_{\text{l}}^{\text{g}}H_{\text{m}}^{\circ}(298.15 \text{ K})$  also appears to be a function of the Kovats indices in different homologous series of alkanes, alcohols, aliphatic ethers, and alkylbenzenes [17–19]. In the Kovats retention index,  $J_x$ , used in gas chromatography,  $n$ -alkanes serve as the standards and logarithmic interpolation is utilized as defined by

$$J_x = \frac{\lg(t_x) - \lg(t_N)}{\lg(t_{N+1}) - \lg(t_N)} \times 100 + 100N \quad (\text{S8})$$

where  $x$  refers to the adjusted retention time  $t$ ,  $N$  is the number of carbon atoms of the  $n$ -alkane eluting before, and  $(N + 1)$  is the number of carbon atoms of the  $n$ -alkane eluting after the peak of interest. Thus, the retention time  $t_x$  of the compound of interest  $x$  is encompassed by retention times of the two  $n$ -alkanes.

**Table S5.** Thermochemical data at  $T = 298.15 \text{ K}$  ( $p^{\circ} = 0.1 \text{ MPa}$ ) for the pyridine and aniline derivatives,  $\text{kJ}\cdot\text{mol}^{-1}$ .

| Compounds                          | $\Delta_{\text{f}}H_{\text{m}}^{\circ}(\text{liq})_{\text{exp}}^{\text{a}}$ | $\Delta_{\text{l}}^{\text{g}}H_{\text{m}}^{\circ}^{\text{a}}$ | $\Delta_{\text{f}}H_{\text{m}}^{\circ}(\text{g})_{\text{exp}}$ | $\Delta_{\text{f}}H_{\text{m}}^{\circ}(\text{g})_{\text{G4}}^{\text{b}}$ |
|------------------------------------|-----------------------------------------------------------------------------|---------------------------------------------------------------|----------------------------------------------------------------|--------------------------------------------------------------------------|
| 1                                  | 2                                                                           | 3                                                             | 4                                                              | 5                                                                        |
| pyridine [20]                      | 100.2±0.7                                                                   | 40.2±0.2                                                      | 140.4±0.7                                                      | 141.2                                                                    |
| 2-methyl-pyridine [20]             | 56.7±0.8                                                                    | 42.5±0.2                                                      | 99.2±0.8                                                       | 99.1                                                                     |
| 4-methylpyridine [20]              | 59.2±0.9                                                                    | 44.9±0.2                                                      | 104.10.9                                                       | 104.0                                                                    |
| 2,6-dimethylpyridine [20]          | 12.7±1.5                                                                    | 46.0±0.4                                                      | 58.7±1.6                                                       | 57.0                                                                     |
| 2-tert-butyl-pyridine <sup>c</sup> | -41.9±4.9                                                                   | 42.7±1.3                                                      | 0.8±4.7                                                        | 16.7                                                                     |
| 4-tert-butyl-pyridine [21]         | -29.4±3.6                                                                   | 54.4±1.3                                                      | 25.0±3.8                                                       | 24.7                                                                     |
| 2,6-di-tert-butyl-pyridine [21]    | -162.7±4.4                                                                  | 56.6±1.2                                                      | -105.5±4.6                                                     | -106.7                                                                   |
| 1,3,5-triazine [22]                | 184.7±0.9 <sup>d</sup>                                                      | 41.2±0.5 <sup>d</sup>                                         | 225.9±1.0                                                      | 226.1                                                                    |
| aniline [20]                       | 31.3±1.0                                                                    | 55.8±0.2                                                      | 87.1±1.0                                                       | 89.2                                                                     |
| <i>N</i> -methyl-aniline [23]      | 35.9±2.1                                                                    | 55.0±0.2                                                      | 90.9±2.1                                                       | 94.8                                                                     |
| <i>N,N</i> -dimethyl-aniline [24]  | 46.0±0.9                                                                    | 54.0±0.5                                                      | 100.01.0                                                       | 100.8                                                                    |
| di-phenyl-amine [25]               | 146.7±2.0 <sup>d</sup>                                                      | 79.0±0.8 <sup>d</sup>                                         | 225.7±2.2                                                      | -                                                                        |
| tri-phenyl-amine                   | 253.6±3.7 <sup>d</sup>                                                      | 90.2±1.2 <sup>d</sup>                                         | 343.8±3.9                                                      | -                                                                        |

<sup>a</sup> Experimental values taken from the literature. <sup>b</sup> Calculated by the atomization reaction. The theoretical  $\Delta_{\text{f}}H_{\text{m}}^{\circ}(\text{g})_{\text{G4}}$  values calculated by the atomisation procedure, were corrected using the linear correlation:  $\Delta_{\text{f}}H_{\text{m}}^{\circ}(\text{g})_{\text{exp}}/\text{kJ}\cdot\text{mol}^{-1} = (1.010 \pm 0.003) \Delta_{\text{f}}H_{\text{m}}^{\circ}(\text{g})_{\text{G4}} + (0.7 \pm 0.4)$  with  $R^2=0.9998$  developed in our previous work. [26]. <sup>c</sup> Calculated according to the Hess's Law applied to reaction: 2,6-di-tert-butyl-pyridine + benzene = 2-tert-butyl-pyridine + tert-butyl benzene. Data for tert-butyl-benzene were taken from [27]. <sup>d</sup> From Table 2 (recalculated from solid)

The G3MP2 method is less time-consuming in comparison to the G4. It has turned out, that the G4 calculations of the following molecules: 2,6-di-tert-butyl-pyrazine, 2,6-di-tert-butylpyridine, *N,N*-di-phenyl-amine and tri-phenyl-amine, performed on the Computational Centre of University of Rostock was not completed due to common time-restrictions. Thus, the computations have been conducted by the G3MP2 method. A linear

correlation between experimental and calculated by G3MP2 atomisation enthalpies of formation was established in our previous work [28]:

$$\Delta_f H_m^{\circ}(\text{g, exp})/\text{kJ}\cdot\text{mol}^{-1} = 0.992 \times \Delta_f H_m^{\circ}(\text{g, AT}) + 10.3 \quad (\text{S9})$$

Using this correlation the “corrected” enthalpies of formation of large molecules (2,6-*di-tert*-butylpyrazine, 2,6-*di-tert*-butylpyridine, *N,N*-*di*-phenyl-amine and *tri*-phenyl-amine) have been calculated (see Tables 8-9).

**Table S6.** Group-additivity values for calculation of enthalpies of vaporization,  $\Delta_1^{\text{g}} H_m^{\circ}$  (298.15 K), of alkanes and amines at 298.15 K (in kJ mol<sup>-1</sup>).

| Increment                                       | $\Delta_1^{\text{g}} H_m^{\circ}$ |
|-------------------------------------------------|-----------------------------------|
| <b>Alkanes</b>                                  |                                   |
| C-(C)(H) <sub>3</sub>                           | 6.33                              |
| C-(C) <sub>2</sub> (H) <sub>2</sub>             | 4.52                              |
| C-(C) <sub>3</sub> (H)                          | 1.24                              |
| C-(C) <sub>4</sub>                              | -2.69                             |
| <b>Amines<sup>a</sup></b>                       |                                   |
| C-(N)(C)(H) <sub>2</sub>                        | 2.9                               |
| C-(N)(C) <sub>2</sub> (H)                       | -2.0                              |
| C-(N)(C) <sub>3</sub>                           | -7.7                              |
| N-(C)(H) <sub>2</sub>                           | 18.0                              |
| N-(C) <sub>2</sub> (H)                          | 12.6                              |
| N-(C) <sub>3</sub>                              | 4.9                               |
| <b>Ring-corrections</b>                         |                                   |
| aliphatic six-ring                              | 5.9                               |
| piperidine six-ring                             | 7.3                               |
| N-methyl-piperidine six-ring                    | 7.3                               |
| piperazine six-ring                             | 12.7                              |
| N-methyl-piperazine six-ring                    | 10.6                              |
| N,N-dimethyl-piperazine six-ring                | 9.7                               |
| <b>Nearest-neighbor-corrections</b>             |                                   |
| C <sub>t</sub> -C <sub>q</sub>                  | 1.9                               |
| 1,2-di-methyl                                   | -0.8                              |
| <i>ortho</i> -C <sub>q</sub> -NH-C <sub>s</sub> | 3.7                               |
| 2,6-C <sub>q</sub> -NH-C <sub>t</sub>           | 6.1                               |

<sup>a</sup> Validation of increments is given in Table S7.

**Table S7.** Experimental and estimated by group-additivity vaporization enthalpies at  $T = 298.15$  K for cyclohexanamines (in kJ·mol<sup>-1</sup>)<sup>a</sup>.

| compound                             | $\Delta_1^{\text{g}} H_m^{\circ}$<br>exp | $\Delta_1^{\text{g}} H_m^{\circ}$<br>add |
|--------------------------------------|------------------------------------------|------------------------------------------|
| cyclohexanamine                      | 43.9±0.2                                 | 44.5                                     |
| <i>N</i> -methyl-cyclohexanamine     | 46.4±0.3                                 | 44.9                                     |
| <i>N,N</i> -dimethyl-cyclohexanamine | 45.6±0.3                                 | 44.1                                     |
| <i>N</i> -cyclohexyl-cyclohexanamine | 64.1±0.3                                 | 65.1                                     |

<sup>a</sup> Experimental data from [29].

### Calculation of $\Delta_f H_m^{\circ}(\text{g})$ by using quantum-chemistry.

The latest G4 method from the G\*-family is comparably more time consuming but it was found to be more accurate with a mean absolute deviation of 3.5 kJ·mol<sup>-1</sup> tested with 483 molecules of different structure and size in the G3/05 test set. Demonstration of agreement between two independent theoretical methods as well as with available experimental results can provide strong validation for both results and to establish thermochemical data of benchmark quality. Enthalpies  $H_{298}$  calculated by the G4 were converted to

enthalpies of formation  $\Delta_f H_m^0(\text{g}, 298.15 \text{ K})$  using the conventional atomization reactions. Results of calculations are given in Tables S8–S11.

The  $\Delta_f H_m^0(\text{g}, 298.15 \text{ K})$ -values required for thermodynamic analysis of hydrogenation/dehydrogenation reactions can be calculated according to the Hess's Law in two ways:

$$\Delta_r H_m^0(\text{g}) = \Delta_f H_m^0(\text{g}, \text{products}) - \Delta_f H_m^0(\text{g}, \text{reactants}) \quad (\text{S7})$$

$$\Delta_r H_m^0(\text{g}) = H_{298}(\text{g}, \text{products}) - H_{298}(\text{g}, \text{reactants}) \quad (\text{S8})$$

Both ways are not equivalent. As can be seen from Tables S8-S11 the  $\Delta_r H_m^0(\text{g})$ -values calculated by Equation S10 are systematically of 5-10  $\text{kJ}\cdot\text{mol}^{-1}$  more negative in comparison to results by Equation S11. The possible reasons are usually explained for an imbalance of electronic energies calculated for the atomisation reaction participants. From our experiences, more elegant and reliable excess to the desired  $\Delta_r H_m^0(\text{g}, 298.15 \text{ K})$ -values is calculation by Equation S11 directly from the  $H_{298}$  values calculated by a suitable QC method.

**Table S8.** Reaction enthalpy of hydrogenation/dehydrogenation of pyrazine derivatives, at  $T = 298.15 \text{ K}$  ( $p^\circ = 0.1 \text{ MPa}$ ) in  $\text{kJ}\cdot\text{mol}^{-1}$ .

| Compounds <sup>a</sup>     | $\Delta_f H_m^0(\text{g})_{\text{G4}^b}$                                            | $\Delta_f H_m^0(\text{g})_{\text{G4}^c}$ | $\Delta_r H_m^0(\text{g})_{\text{G4}^d}$ | $\Delta_r H_m^0(\text{g})_{\text{G4}^e}$ |        |
|----------------------------|-------------------------------------------------------------------------------------|------------------------------------------|------------------------------------------|------------------------------------------|--------|
| 1                          | 2                                                                                   | 3                                        | 4                                        | 5                                        |        |
| pyrazine                   |    | 209.9                                    | 32.0                                     | -177.9                                   | -168.7 |
| methyl-pyrazine            |   | 162.7                                    | -9.5                                     | -172.2                                   | -166.3 |
| 2,3-di-methyl-pyrazine     |  | 120.7                                    | -42.9                                    | -163.6                                   | -157.8 |
| 2,5-di-methyl-pyrazine     |  | 119.7                                    | -45.7                                    | -165.4                                   | -159.5 |
| tri-methyl-pyrazine        |  | 77.3                                     | -82.3                                    | -159.6                                   | -153.8 |
| tetra-methyl-pyrazine      |  | 36.9                                     | -118.2                                   | -155.1                                   | -149.4 |
| tert-butyl-pyrazine        |  | 83.6                                     | -82.1                                    | -168.4                                   | -159.8 |
| 2,6-di-tert-butyl-pyrazine |  | -29.9 <sup>f</sup>                       | -158.7 <sup>f</sup>                      | -129.9                                   | -132.3 |
| 1,3,5-triazine             |  | 226.1                                    | 91.6                                     | -134.5                                   | -129.0 |

<sup>a</sup> Only the fully dehydrogenated molecules are shown. <sup>b</sup> For the fully dehydrogenated molecules. <sup>c</sup> For the fully hydrogenated molecules. <sup>d</sup> Calculated as the difference between column 3 and 2 in this table. <sup>e</sup> Calculated from  $H_{298}$ -values of products and reactants of the hydrogenation reaction. <sup>f</sup> Calculated with the G3MP2 by using atomization (AT) procedure and corrected according to equation:  $\Delta_f H_m^0(\text{g}, \text{exp})/\text{kJ}\cdot\text{mol}^{-1} = 0.992 \times \Delta_f H_m^0(\text{g}, \text{AT}) + 10.3$ .

**Table S9.** Reaction enthalpy of hydrogenation/dehydrogenation of quinoxaline derivatives, at  $T = 298.15 \text{ K}$  ( $p^\circ = 0.1 \text{ MPa}$ ) in  $\text{kJ}\cdot\text{mol}^{-1}$ .

| Compounds <sup>a</sup>          | $\Delta_f H_m^0(\text{g})_{\text{G4}^b}$                                            | $\Delta_f H_m^0(\text{g})_{\text{G4}^c}$ | $\Delta_r H_m^0(\text{g})_{\text{G4}^d}$ | $\Delta_r H_m^0(\text{g})_{\text{G4}^e}$ |        |
|---------------------------------|-------------------------------------------------------------------------------------|------------------------------------------|------------------------------------------|------------------------------------------|--------|
| quinoxaline                     |  | 260.9                                    | -43.8                                    | -304.7                                   | -294.7 |
| 2-methylquinoxaline             |  | 215.9                                    | -83.7                                    | -299.6                                   | -289.7 |
| 2,3-di-methyl-quinoxaline       |  | 171.2                                    | -118.9                                   | -290.1                                   | -280.3 |
| 2,6-di-methyl-1,5-naphthyridine |  | 164.7                                    | -125.7                                   | -290.4                                   | -280.6 |
| phenazine                       |  | 329.2                                    | -120.1                                   | -449.3                                   | -435.1 |

<sup>a</sup> Only the fully dehydrogenated molecules are shown. <sup>b</sup> For the fully dehydrogenated molecules. <sup>c</sup> For the fully hydrogenated molecules. <sup>d</sup> Calculated as the difference between column 3 and 2 in this table. <sup>e</sup> Calculated from  $H_{298}$ -values of products and reactants of the hydrogenation reaction.

**Table S10.** Reaction enthalpy of hydrogenation/dehydrogenation of pyridine derivatives, at  $T = 298.15$  K ( $p^\circ = 0.1$  MPa) in  $\text{kJ}\cdot\text{mol}^{-1}$ .

| Compounds <sup>a</sup>    |                                                                                    | $\Delta_f H_m^0(\text{g})_{\text{G4}^b}$ | $\Delta_f H_m^0(\text{g})_{\text{G4}^c}$ | $\Delta_r H_m^0(\text{g})_{\text{G4}^d}$ | $\Delta_r H_m^0(\text{g})_{\text{G4}^e}$ |
|---------------------------|------------------------------------------------------------------------------------|------------------------------------------|------------------------------------------|------------------------------------------|------------------------------------------|
| pyridine                  |   | 141.2                                    | -43.3                                    | -184.5                                   | -178.6                                   |
| 2-methylpyridine          |   | 99.1                                     | -81.7                                    | -180.8                                   | -174.7                                   |
| 4-methylpyridine          |   | 104.0                                    | -77.1                                    | -181.1                                   | -175.1                                   |
| 2,6-dimethylpyridine      |   | 57.0                                     | -119.8                                   | -176.8                                   | -170.9                                   |
| 2-tert-butylpyridine      |   | 16.7                                     | -158.4                                   | -175.1                                   | -169.1                                   |
| 4-tert-butylpyridine      |   | 24.7                                     | -151.2                                   | -175.9                                   | -170.0                                   |
| 2,6-di-tert-butylpyridine |  | -94.6 <sup>f</sup>                       | -258.9 <sup>f</sup>                      | -165.6                                   | -168.1                                   |

<sup>a</sup> Only the fully dehydrogenated molecules are shown. <sup>b</sup> For the fully dehydrogenated molecules. <sup>c</sup> For the fully hydrogenated molecules. <sup>d</sup> Calculated as the difference between column 3 and 2 in this table. <sup>e</sup> Calculated from  $H_{298}$ -values of products and reactants of the hydrogenation reaction. <sup>f</sup> Calculated with the G3MP2 by using atomization (AT) procedure and corrected according to equation:  $\Delta_f H_m^0(\text{g, exp})/\text{kJ}\cdot\text{mol}^{-1} = 0.992 \times \Delta_f H_m^0(\text{g, AT}) + 10.3$ .

**Table S11.** Reaction enthalpy of hydrogenation/dehydrogenation of aniline derivatives, at  $T = 298.15$  K ( $p^\circ = 0.1$  MPa) in  $\text{kJ}\cdot\text{mol}^{-1}$ .

| Compounds <sup>a</sup>      |                                                                                     | $\Delta_f H_m^0(\text{g})_{\text{G4}^b}$ | $\Delta_f H_m^0(\text{g})_{\text{G4}^c}$ | $\Delta_r H_m^0(\text{g})_{\text{G4}^d}$ | $\Delta_r H_m^0(\text{g})_{\text{G4}^e}$ |
|-----------------------------|-------------------------------------------------------------------------------------|------------------------------------------|------------------------------------------|------------------------------------------|------------------------------------------|
| aniline                     | 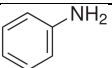 | 89.2                                     | -101.9                                   | -191.1                                   | -185.0                                   |
| <i>N</i> -methylaniline     |  | 94.8                                     | -94.2                                    | -189.0                                   | -183.0                                   |
| <i>N,N</i> -dimethylaniline |  | 100.8                                    | -94.0                                    | -194.8                                   | -188.6                                   |
| <i>N,N</i> -diphenylamine   |  | 214.7 <sup>f</sup>                       | -164.1 <sup>f</sup>                      | -381.8                                   | -386.6                                   |
| <i>tri</i> -phenyl-amine    |  | 320.0 <sup>f</sup>                       | -226.3 <sup>f</sup>                      | -550.7                                   | -558.0                                   |

<sup>a</sup> Only the fully dehydrogenated molecules are shown. <sup>b</sup> For the fully dehydrogenated molecules. <sup>c</sup> For the fully hydrogenated molecules. <sup>d</sup> Calculated as the difference between column 3 and 2 in this table. <sup>e</sup> Calculated from  $H_{298}$ -values of products and reactants of the hydrogenation reaction. <sup>f</sup> Calculated with the G3MP2 by using atomization (AT) procedure and corrected according to equation:  $\Delta_f H_m^0(\text{g, exp})/\text{kJ}\cdot\text{mol}^{-1} = 0.992 \times \Delta_f H_m^0(\text{g, AT}) + 10.3$ .

**Table S12.** Thermodynamic analysis of the dehydrogenation of ethylbenzene in the gas phase (at  $p^\circ = 0.1$  MPa) calculated using G4 method and thermodynamic equilibrium constant  $K_p$  and  $K_a$  at 298 K and 400 K.



| Reactants/Products                                                | 298.15 K (G4)                              |             | 300 K (exp) <sup>30</sup>               |
|-------------------------------------------------------------------|--------------------------------------------|-------------|-----------------------------------------|
|                                                                   | Free Energy                                | Enthalpy    |                                         |
|                                                                   | Hartree                                    |             |                                         |
| ethylbenzene                                                      | -310.687825                                | -310.647334 |                                         |
| styrene                                                           | -309.477093                                | -309.4377   |                                         |
| hydrogen                                                          | -1.179507                                  | -1.164715   |                                         |
| $\Delta_r G_m^0 / \text{kJ}\cdot\text{mol}^{-1}$                  | 82.0                                       |             | 83.0                                    |
| $\Delta_r H_m^0 / \text{kJ}\cdot\text{mol}^{-1}$                  | 117.9                                      |             |                                         |
| $\Delta_r S_m^0 / \text{J}\cdot\text{mol}^{-1}\cdot\text{K}^{-1}$ | 120.6                                      |             |                                         |
|                                                                   | $K_{p \text{ calc}} = 4.3 \times 10^{-15}$ |             | $K_{p \text{ exp}} 3.5 \times 10^{-15}$ |
| Reactants/Products                                                | 400 K (G4)                                 |             | 400 K (exp) <sup>30</sup>               |
|                                                                   | Free Energy                                | Enthalpy    |                                         |
|                                                                   | Hartree                                    |             |                                         |
| ethylbenzene                                                      | -310.702532                                | -310.641574 |                                         |
| styrene                                                           | -309.491609                                | -309.432304 |                                         |
| hydrogen                                                          | -1.184735                                  | -1.163587   |                                         |
| $\Delta_r G_m^0 / \text{kJ}\cdot\text{mol}^{-1}$                  | 68.8                                       |             | 83.0                                    |
| $\Delta_r H_m^0 / \text{kJ}\cdot\text{mol}^{-1}$                  | 119.9                                      |             |                                         |
| $\Delta_r S_m^0 / \text{J}\cdot\text{mol}^{-1}\cdot\text{K}^{-1}$ | 128.0                                      |             |                                         |
|                                                                   | $K_{p \text{ calc}} = 1.1 \times 10^{-9}$  |             | $K_{p \text{ exp}} 3.3 \times 10^{-9}$  |

**Table S13.** Thermodynamic analysis of the hydrogenation of 2,5-di-methyl-pyrazine in the gas phase (at  $p^\circ = 0.1$  MPa) calculated using G4 method and thermodynamic equilibrium constant  $K_p$  at 298 K and 400 K.

| Reactants/Products                                                | 298 K                |             | 400 K       |             |
|-------------------------------------------------------------------|----------------------|-------------|-------------|-------------|
|                                                                   | Free Energy          | Enthalpy    | Free Energy | Enthalpy    |
|                                                                   | Hartree              |             |             |             |
| 2,5-dimethylpyrazine                                              | -342.784133          | -342.799215 | -342.736913 | -342.742438 |
| $3 \times \text{H}_2$                                             | $3 \times -1.179507$ | -1.184735   | -1.163587   | -1.164715   |
| 2,5-dimethylpiperazine                                            | -346.339086          | -346.354357 | -346.29063  | -346.297345 |
| $\Delta_r G_m^0 / \text{kJ}\cdot\text{mol}^{-1}$                  | -43.1                |             | -2.5        |             |
| $\Delta_r H_m^0 / \text{kJ}\cdot\text{mol}^{-1}$                  | -159.5               |             | -165.3      |             |
| $\Delta_r S_m^0 / \text{J}\cdot\text{mol}^{-1}\cdot\text{K}^{-1}$ | -390.4               |             | -407.1      |             |
| $K_{p \text{ calc}}$                                              | $3.6 \times 10^7$    |             | 2.1         |             |

**Table S14.** Experimental vapor pressures of hydrogenation/dehydrogenation reactions participants used for adjustment of the theoretical thermodynamic equilibrium constant  $K_p$  to the liquid phase equilibrium constant  $K_a$ .

| Compounds              | $p$ , atm | $p$ , atm | Ref. |
|------------------------|-----------|-----------|------|
|                        | 298 K     | 400 K     |      |
| pyrazine               | 0.0240    | 1.36      | [6]  |
| piperazine             | 0.0041    | 0.513     | [31] |
| 2,5-dimethylpyrazine   | 0.0036    | 0.388     | [11] |
| 2,5-dimethylpiperazine | 0.0016    | 0.331     | [32] |

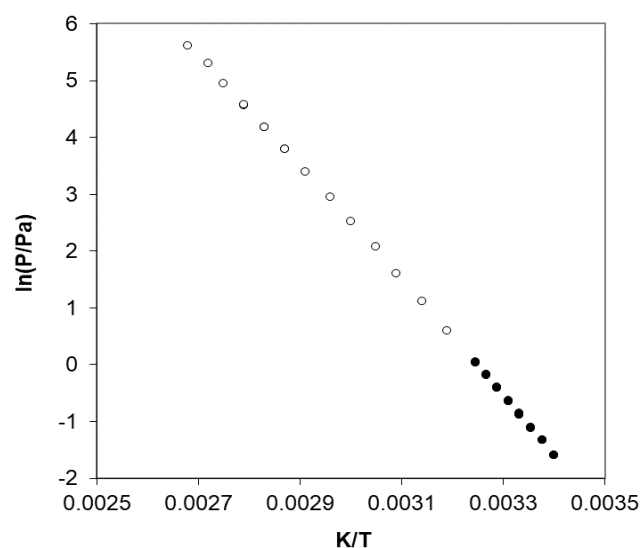

**Figure S2.** Temperature dependence of vapor pressures over the 2,3-di-methyl-quinoxaline: ○: this work; ●: [33]

## References

- Verevkin, S.P.; Emel'yanenko, V.N. Transpiration method: Vapor pressures and enthalpies of vaporization of some low-boiling esters. *Fluid Phase Equilib.* **2008**, *266*, 64–75.
- Verevkin, S.P.; Sazonova, A.Y.; Emel'yanenko, V.N.; Zaitsau, D.H.; Varfolomeev, M.A.; Solomonov, B.N.; Zherikova, K.V. Thermochemistry of halogen-substituted methylbenzenes. *J. Chem. Eng. Data.* **2015**, *60*, 89–103.
- Emel'yanenko, V.N.; Verevkin, S.P. Benchmark thermodynamic properties of 1,3-propanediol: Comprehensive experimental and theoretical study. *J. Chem. Thermodyn.* **2015**, *85*, 111–119.
- Chickos, J.S.; Acree, W.E. Enthalpies of vaporization of organic and organometallic compounds, 1880–2002. *J. Phys. Chem. Ref. Data* **2003**, *32*, 519–878.
- Chickos, J.S.; Hosseini, S.; Hesse, D.G.; Liebman, J.F. Heat capacity corrections to a standard state: a comparison of new and some literature methods for organic liquids and solids. *Struct. Chem.* **1993**, *4*, 271–278.
- Sergey P. Verevkin, Vladimir N. Emel'yanenko, Rafael Notario, María Victoria Roux, James S. Chickos, and Joel F. Liebman Rediscovering the Wheel. Thermochemical Analysis of Energetics of the Aromatic Diazines. *J. Phys. Chem. Lett.* **2012**, *3*, 3454–3459
- Kobe, K.A.; Mathews, J.F. Critical Properties and Vapor Pressures of Some Organic Nitrogen and Oxygen Compounds. *J. Chem Eng Data* **1970**, *15*, 182–186.
- Sakoguchi, A.; Ueoka, R.; Kato, Y.; Arai, Y. Vapor Pressures of Alkylpyridines and Alkylpyrazines. *Kagaku Kogaku Ronbun* **1995**, *21*, 219–223.
- Lipkind, D.; Chickos, J.S. An examination of the vaporization enthalpies and vapor pressures of pyrazine, pyrimidine, pyridazine, and 1,3,5-triazine. *Struct. Chem.* **2009**, *20*, 49–58.
- Ben-Makhlouf-Hakem, H.; Ait-Kaci, A.; Jose, J. Isothermal vapor–liquid equilibria and excess molar enthalpy of 2-methylpyrazine (2MP) containing binary mixtures. Comparison with DISQUAC predictions. *Fluid Phase Equilib.* **2015**, *397*, 131–140.
- Verevkin, S.P.; Nagrimanov, R.N.; Zaitsau, D.H.; Konnova, M.E.; Pimerzin, A.A. Thermochemical properties of pyrazine derivatives as a seminal liquid organic hydrogen carriers for hydrogen storage. *J. Chem. Thermodyn.* **2020**, JCT-D-20-00306
- Morais, V.M.F.; Miranda, M.S.; Matos, M.A.R. Thermochemical study of the ethylpyridine and ethylpyrazine isomers. *Org. Biomol. Chem.* **2003**, *1*, 4329–4334.
- Ribeiro da Silva, M.D.M.C.; Cabral, J.I.T.A.; Givens, C.; Keown, S.; Acree Jr, W.E. Thermochemical study of three dimethylpyrazine derivatives, *J. Therm. Anal. Calorim.* **2018**, *92*, 73–78
- Ribeiro da Silva, M.A.V.; Morais, V.M.F.; Matos, M.A.R.; Rio, C.M.A.; Piedade, G.M.G.S., Thermochemical and theoretical study of some methyldiazines. *Struct. Chem.* **1996**, *7*, 329–336.
- Emel'yanenko, V.N.; Zaitsau, D.H.; Shoifet, E.; Meurer, F.; Verevkin, S.P.; Schick, C.; Held, C. Benchmark Thermochemistry for Biologically Relevant Adenine and Cytosine. A Combined Experimental and Theoretical Study. *J. Phys. Chem. A* **2015**, *119*, 9680–9691.
- Gobble, C.; Chickos, J.; Verevkin, S.P. Vapor pressures and vaporization enthalpies of a series of dialkyl phthalates by correlation gas chromatography. *J. Chem. Eng. Data* **2014**, *59*, 1353–1365.
- Verevkin, S.P. Heintz, A. Determination of Vaporization Enthalpies of the Branched Esters from Correlation Gas-Chromatography and Transpiration Methods. *J. Chem. Eng. Data* **1999**, *44*, 1240–1244.

18. Verevkin, S.P.; Krasnykh, E.L.; Vasil'tsova, T.V.; Heintz, A. Determination of Vaporization Enthalpies of the Branched Ethers from Transpiration and Correlation Gas-Chromatography Methods. *J. Chem. Eng. Data* **2003**, *48*, 591–599.
19. Verevkin, S.P. Vapour pressures and enthalpies of vaporization of a series of the linear n-alkyl-benzenes. *J. Chem. Thermodyn.* **2006**, *38*, 1111–1123.
20. Pedley, J.B.; Naylor, R.D.; Kirby, S.P. *Thermochemical Data of Organic Compounds*; Chapman and Hall: New York, NY, USA, 1986.
21. Freitas, V.L.S.; Acree Jr., W.E.; Ribeiro daSilva, M.D.M.C. Thermochemical Study of Three Hindered Pyridine Derivatives. *J. Chem. Eng. Data* **2008**, *53*, 1820–1823.
22. Bystrom, K., The stabilization energy of 1,3,5-triazine derived from measurements of the enthalpies of combustion and sublimation. *J. Chem. Thermodyn.* **1982**, *14*, 865–870.
23. Emel'yanenko, V.N.; Pimerzin, A.A.; Turovtsev, V.V.; Verevkin, S.P. Benchmark Thermochemistry of N-methylaniline. *J. Phys. Chem. A* **2015**, *119*, 2142–2121.
24. Verevkin, S.P. Thermochemistry of amines: experimental standard molar enthalpies of formation of some aliphatic and aromatic amines. *J. Chem. Thermodyn.* **1997**, *29*, 891–899.
25. Surov, A.O.; Perlovich, G.L.; Emel'yanenko, V.N.; Verevkin, S.P. Thermochemistry of Drugs. Experimental and First-Principles Study of Fenamates. *J. Chem. Eng. Data* **2011**, *56*, 4325–4332.
26. Verevkin, S.P.; Emel'yanenko, V.N.; Notario, R.; Roux, M.V.; Chickos, J.S.; Liebman, J.F. Rediscovering the Wheel. Thermochemical Analysis of Energetics of the Aromatic Diazines. *J. Phys. Chem. Lett.* **2012**, *3*, 3454–3459.
27. Verevkin, S.P.; Kozlova, S.A.; Emel'yanenko, V.N.; Goodrich, P.; Hardacre, C. Thermochemistry of Ionic Liquid-Catalysed Reactions. Experimental and Theoretical Study of Chemical Equilibria of Isomerisation and Transalkylation of tert-Butyl-Benzene. *J. Phys. Chem. A* **2008**, *112*, 11273–11282.
28. Verevkin, S.P.; Emel'yanenko, V.N.; Pimerzin, A.A.; Vishnevskaya, E.E. Thermodynamic Analysis of Strain in the Five-Membered Oxygen and Nitrogen Heterocyclic Compounds. *J. Phys. Chem. A* **2011**, *115*, 1992–2004.
29. Verevkin, S.P.; Emel'yanenko, V.N. Thermodynamic properties of cyclohexanamines: experimental and theoretical study. *Thermochimica Acta* **2015**, *608*, 40–48.
30. Stull, D.R.; Westrum, E.F.; Sinke, G.C. *The chemical thermodynamics of organic compound*; Wiley: New York, NY, USA, 1969.
31. Steele, W.V.; Chirico, R.D.; Knipmeyer, S.E.; Nguyen, A.; Smith, N.K. Thermodynamic properties and ideal-gas enthalpies of formation for dicyclohexyl sulfide, diethylenetriamine, di-n-octyl sulfide, dimethyl carbonate, piperazine, hexachloroprop-1-ene, tetrakis(dimethylamino)ethylene, N,N'-bis-(2-hydroxyethyl)ethylenediamine, and 1,2,4-triazolo[1,5- $\alpha$ ]pyrimidine. *J. Chem. Eng. Data* **1997**, *42*, 1037–1052.
32. Kobe, K.A. Mathews, J.F. Critical Properties and Vapor Pressures of Some Organic Nitrogen and Oxygen Compounds. *J. Chem. Eng. Data* **1970**, *15*, 182–186.
33. Monte, M.J.S.; Hillesheim, D.M. Thermodynamic Study on the Sublimation of Six Substituted Quinoxalines. *J. Chem. Eng. Data* **2000**, *45*, 1088–1092.
